# Supplementary material
Source: publisher site journal article supplement (http://static.cambridge.org/content/id/urn:cambridge.org:id:article:S1092852920001194/resource/name/S1092852920001194supp001.doc)
Supplement: Supplementary file 1 [file S1092852920001194supp001.doc]

Supplementary table 1. Response* rate of ANX-TRD vs. NANX-TRD to ketamine vs. placebo infusion

|  | NANX-TRD | ANX-TRD | p-value |
| --- | --- | --- | --- |
|  | 0.5mg/kg ketamine infusion (n=24; 11; 13) | |  |
| Responders (n, %) | 6 (54.5) | 5 (38.5) | 0.682 |
|  | 0.2mg/kg ketamine infusion (n=23; 9; 14) | |  |
| Responders (n, %) | 6 (66.7) | 3 (21.4) | 0.077 |
|  | Any ketamine infusion (n=47;20; 27) | |  |
| Responders (n, %) | 12 (60.0) | 8 (29.6) | 0.072 |
|  | Placebo infusion (n=24; 9; 15) | |  |
| Responders (n, %) | 1 (11.1) | 2 (13.3) | >0.999 |

ANX: anxious; NANX: non-anxious; TRD: treatment-resistant depression.

*: Responder status was identified by response (⩾50% reduction of mood ratings) at any two daily HAMD measures during the period of 24 to 96 h (days 2 to 5) after infusion.
